# Supplementary material for: First Insights about Antiparasitic and Action Mechanisms of the Antimicrobial Peptide Hepcidin from Salmonids against Caligus rogercresseyi
Source: MDPI journal article supplement (doi:10.3390/pharmaceutics16030378), 2024-03-08
Supplement: s1 [file s1]

**Table S1:** Structure model prediction of salmonid antimicrobial peptides.

| Peptide    | Residue prediction*                                                                     | 3D model                                                                            |
|------------|-----------------------------------------------------------------------------------------|-------------------------------------------------------------------------------------|
| GsD        | <div>Sequence FIGGIISFFKRLF</div> <div>Prediction CCCHHHHHHHHHC</div>                   |  |
| H2B        | <div>Sequence VSEGTHAVTKYTSSK</div> <div>Prediction CCCCCSSSSSSCCCC</div>               |  |
| Epinecidin | <div>Sequence GFIFHIKGLFHAGKMIHGLV</div> <div>Prediction CCSSHHHHHHHCCCHHHCCC</div>     |  |
| Piscidin   | <div>Sequence FFHHIFRGIVHVGKTIHKLVTG</div> <div>Prediction CHHHHHHHHHHCCCHHHHHHCC</div> |  |
| Hepcidin   | <div>Sequence LCRWCCNCCHNKGCGFCCKF</div> <div>Prediction CCHHHHCCCCCCCCSSSSCC</div>     | Álvarez et al., 2014<br>(27)                                                        |

\* The structural motifs are indicated as H, S, and C for  $\alpha$ -helix,  $\beta$ -sheet, and random coil, respectively.

**Table S2. Mass and purity of synthetic peptides**

| Peptide    | HPLC spectrum                                                                       | ESI-MS Mass spectrum                                                                 |
|------------|-------------------------------------------------------------------------------------|--------------------------------------------------------------------------------------|
| GsD        | 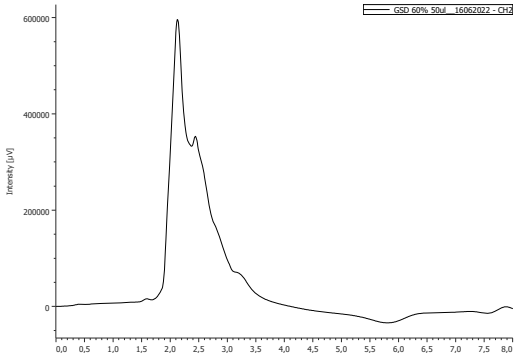   |    |
| H2B        |   |   |
| Epinecidin |  |  |
| Piscidin   |  |  |
| Hepcidin   | Álvarez et al., 2014<br>(27)                                                        | Álvarez et al., 2014<br>(27)                                                         |
